# Supplementary material for: Enhanced catalytic properties of rhodium nanoparticles deposited on chemically modified SiO2 for hydrogenation of nitrile butadiene rubber
Source: Royal Society of Chemistry journal article supplement (doi:10.1039/c4ra11711e), 2014-12-04
Supplement: c4ra11711e1.pdf [file c4ra11711e1.pdf]

## Supporting Online Information

### Enhanced Catalytic Properties of Rhodium Nanoparticles Deposited on Chemically Modified SiO<sub>2</sub> for Hydrogenation of Nitrile Butadiene Rubber

Peng Cao<sup>a</sup>, Yanqiang Ni<sup>a</sup>, Rui Zou<sup>a</sup>, Liqun Zhang<sup>a,b</sup>, Dongmei Yue<sup>a,b\*</sup>

<sup>a</sup> State Key Laboratory of Organic-Inorganic Composites, Beijing University of Chemical Technology, Beijing 100029, China

<sup>b</sup> Key Laboratory of Beijing City on Preparation and Processing of Novel Polymer Materials, Beijing 100029, China

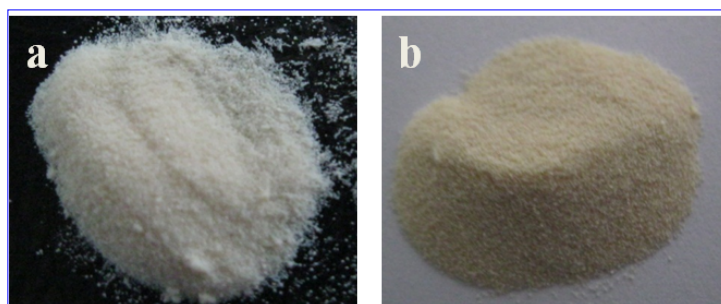

Fig. S1. Images of (a) Rh(III)/SiO<sub>2</sub> **3** and (b) Rh(III)/MSiO<sub>2</sub> **1**.

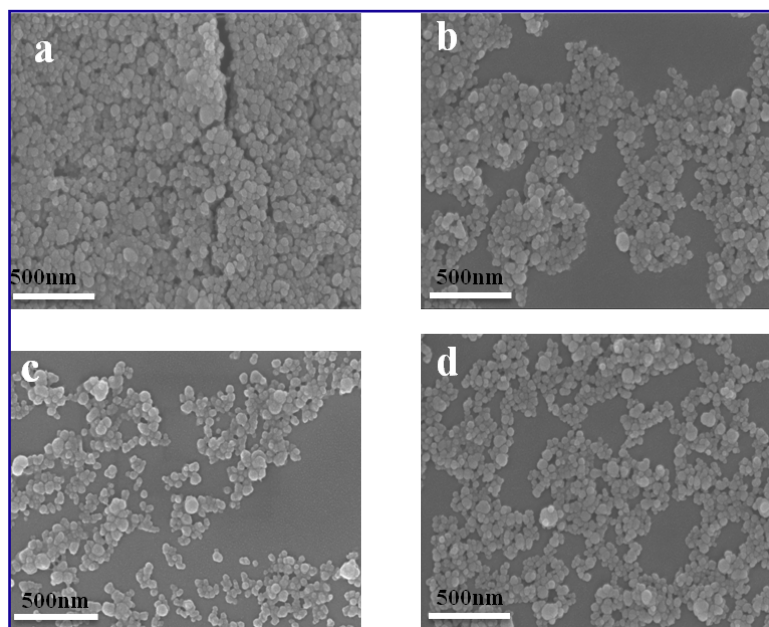

Fig. S2. SEM images of (a) SiO<sub>2</sub>, (b) MSiO<sub>2</sub>, (c) Rh(III)/SiO<sub>2</sub> **3** and (d) Rh(III)/MSiO<sub>2</sub> **1**.

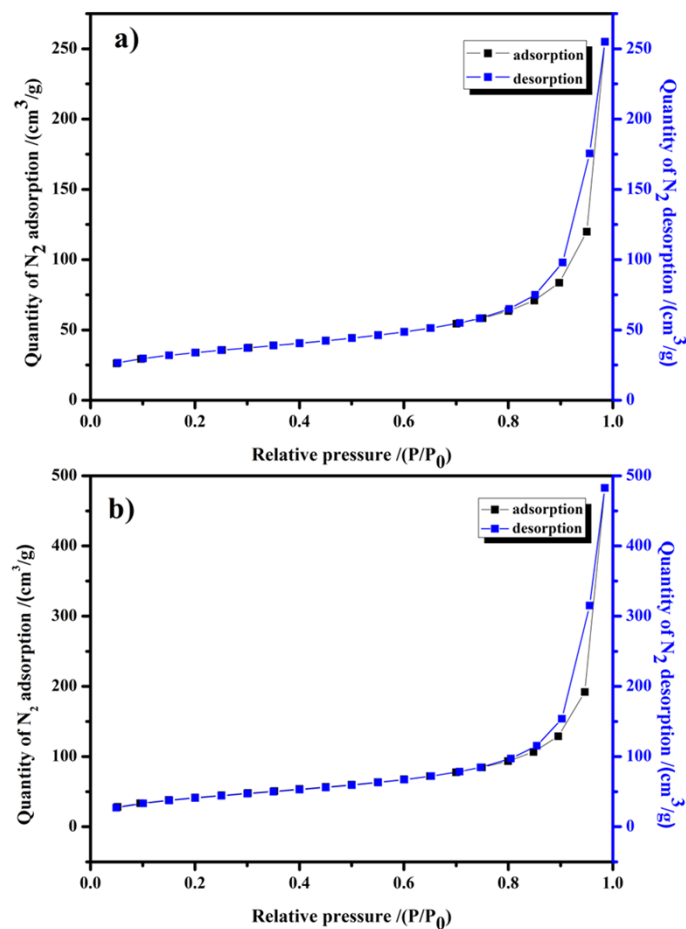

Fig. S3. Nitrogen adsorption/desorption isotherms of (a)  $SiO_2$  and (b)  $MSiO_2$ .

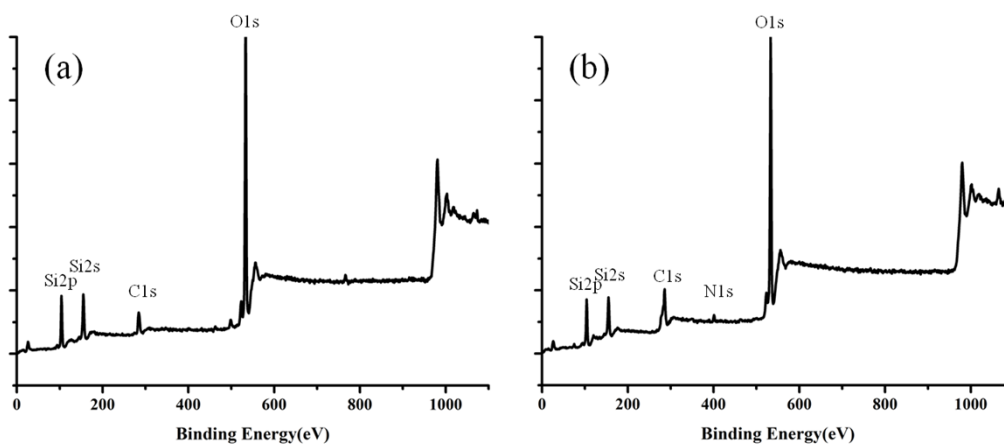

Fig. S4. XPS survey scan of (a)  $SiO_2$  and (b)  $MSiO_2$ .

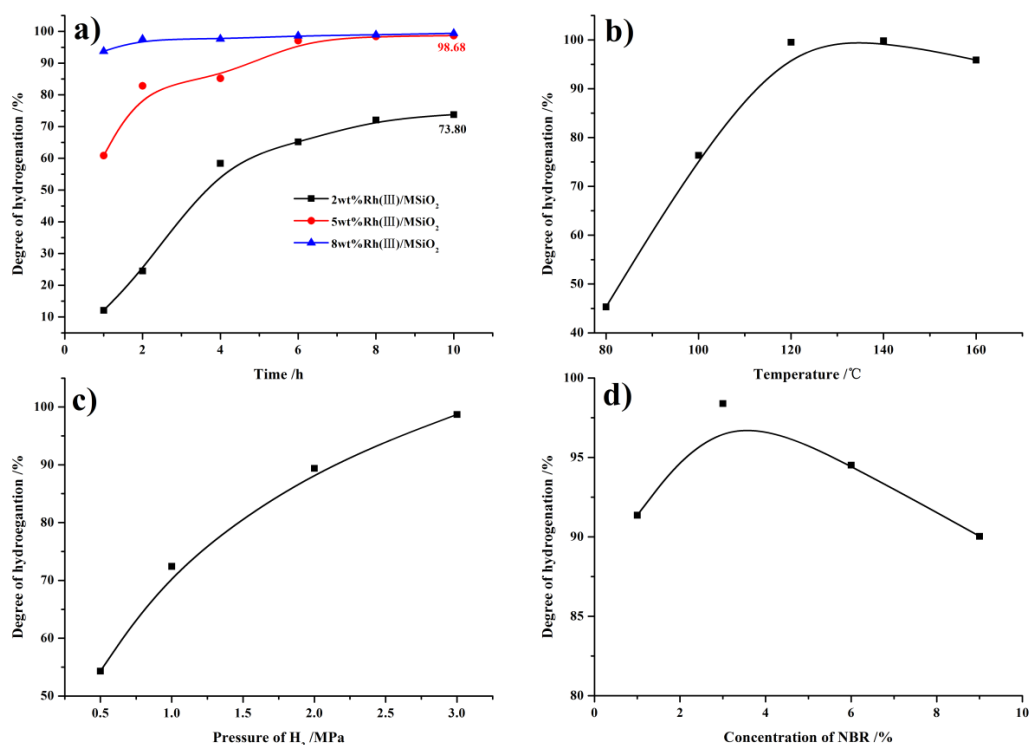

Fig. S5. Degree of hydrogenation of NBR under different reaction conditions with Rh(III)/MSiO<sub>2</sub> 1 as catalyst. Reaction conditions: (a) concentration of NBR solution=3 wt%,  $W_{\text{PPh}_3}/W_{\text{cat.}} = 0.5$ ,  $P_{\text{H}_2}$ =3.0 MPa, and  $T$ =120 °C; (b) concentration of NBR solution=3 wt%,  $W_{\text{cat.}}/W_{\text{NBR}}=0.05$ ,  $W_{\text{PPh}_3}/W_{\text{cat.}}=0.5$ ,  $P_{\text{H}_2}$ =3.0 MPa, and  $t$ =8 h; (c) concentration of NBR solution=3 wt%,  $W_{\text{cat.}}/W_{\text{NBR}}=0.05$ ,  $W_{\text{PPh}_3}/W_{\text{cat.}} = 0.5$ ,  $T$ =120 °C, and  $t$ =8 h; (d) concentration of NBR solution=3 wt%,  $W_{\text{cat.}}/W_{\text{NBR}} = 0.5$ ,  $W_{\text{PPh}_3}/W_{\text{cat.}} = 0.5$ ,  $t$ =8 h, and  $T$ =120 °C.

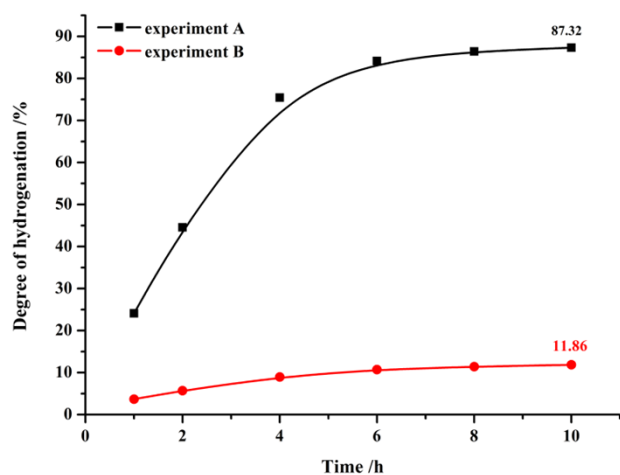

Fig. S6. Catalytic performance of recycled catalyst for hydrogenation of NBR.

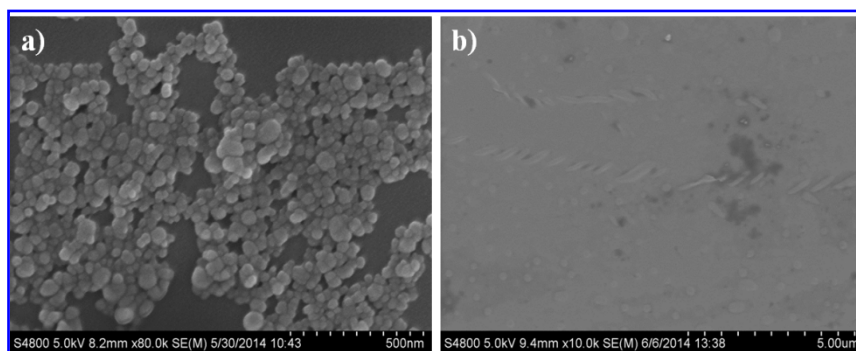

Fig. S7. SEM micrographs of Rh(III)/MSiO<sub>2</sub> 1: (a) before reaction and (b) after 3rd cycle.

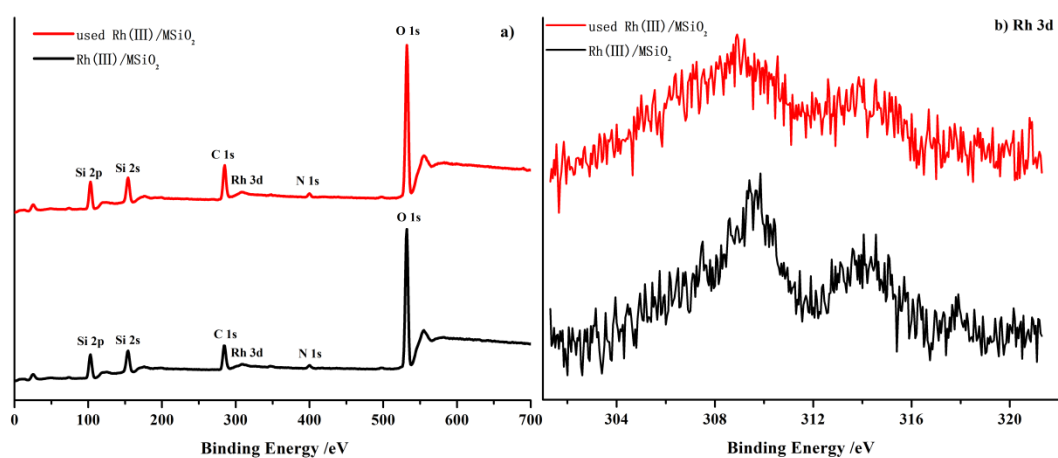

Fig. S8. (a) XPS survey spectra Rh(III)/SiO<sub>2</sub> and used Rh(III)/MSiO<sub>2</sub>; (b) XPS Rh 3d spectra for Rh(III)/SiO<sub>2</sub> and used Rh(III)/MSiO<sub>2</sub>.

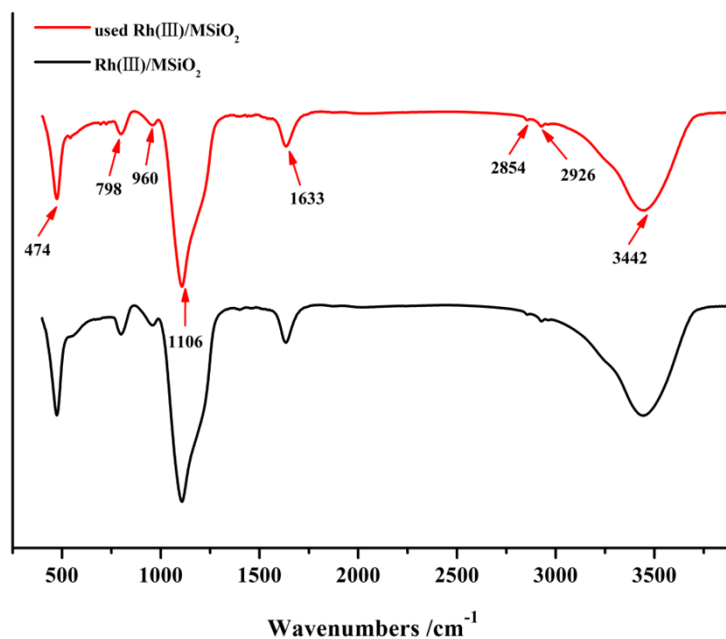

Fig. S9. FTIR spectra of Rh(III)/SiO<sub>2</sub> and used Rh(III)/MSiO<sub>2</sub>.

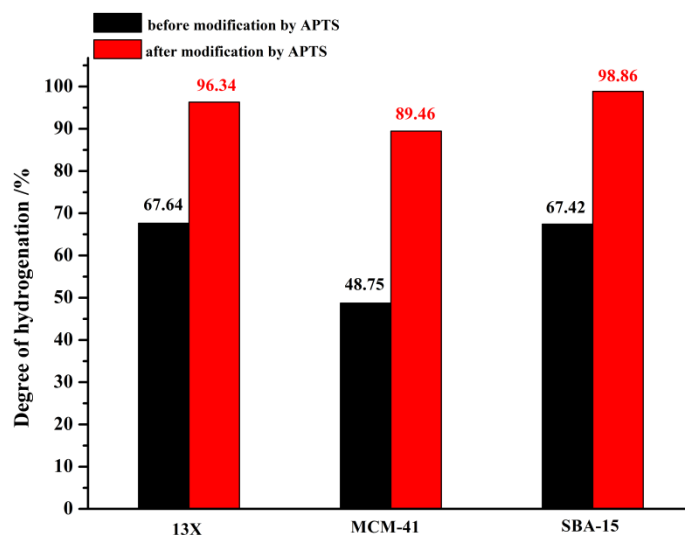

Fig. S10. Effect of various supports catalysts on degree of hydrogenation. Reaction conditions: NBR solution (200 mL, 3 wt%), supported catalyst (0.12 g, 2 wt%), and triphenylphosphine (0.06 g, 1 wt%) were heated at 120 °C and  $H_2$  pressure of 3.0 MPa for 6 h.

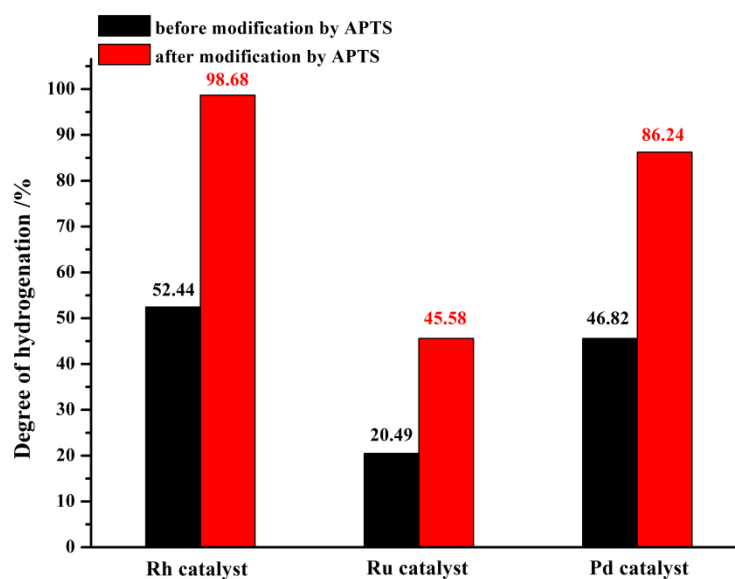

Fig. S11. Effect of different metal catalysts on degree of hydrogenation. Reaction conditions: NBR solution (200 mL, 3 wt %), supported catalyst (0.12 g, 2 wt %), and triphenylphosphine (0.06 g, 1 wt %) were heated at 120°C and  $H_2$  pressure of 3.0 MPa for 6 h.

Table S1. Surface area, pore volume, and average pore diameter from BJH absorption calculation

| Materials         | $S_{\text{BET}}^{\text{a}}$ (m <sup>2</sup> /g) | $V_{\text{p}}^{\text{b}}$ (cm <sup>3</sup> /g) | $D_{\text{BJH}}^{\text{c}}$ (nm) |
|-------------------|-------------------------------------------------|------------------------------------------------|----------------------------------|
| SiO <sub>2</sub>  | 152.44                                          | 0.73                                           | 19.40                            |
| MSiO <sub>2</sub> | 115.30                                          | 0.39                                           | 15.21                            |

<sup>a</sup>BET surface area, <sup>b</sup>pore volume, and <sup>c</sup>average pore diameter from BJH absorption.

Table S2. Results from XPS Si 2p spectrum of SiO<sub>2</sub> in Fig. 4a

| Species          | Position (eV) | Contribution (%) |
|------------------|---------------|------------------|
| Si <sup>4+</sup> | 103.72±0.1    | 97.66±0.2        |
| Si-OH            | 105.92±0.1    | 2.34±0.2         |

Table S3. Results from XPS Si 2p spectrum of MSiO<sub>2</sub> in Fig. 4b

| Species          | Position (eV) | Contribution (%) |
|------------------|---------------|------------------|
| Si <sup>4+</sup> | 103.49±0.1    | 99.92±0.01       |
| Si-OH            | 105.69±0.1    | 0.08±0.01        |

Table S4. Results from XPS N 1s spectra of MSiO<sub>2</sub> in Fig. 4d

| Species                          | Position (eV) | Contribution (%) |
|----------------------------------|---------------|------------------|
| “free”-NH <sub>2</sub>           | 399.8±0.2     | 76.73±0.3        |
| hydrogen bonded -NH <sub>2</sub> | 401.3±0.2     | 23.27±0.3        |

Table S5. Degree of hydrogenation for Rh(III)/MSiO<sub>2</sub> **1** prepared by using different solvents

| Solvents | Water | Water/Ethanol | Ethanol |
|----------|-------|---------------|---------|
| HD (%)   | 96.68 | 95.87         | 96.88   |

Reaction conditions: NBR solution (200 mL, 3 wt%), supported catalyst Rh(III)/MSiO<sub>2</sub> **1** (0.30 g, 5 wt%), and PPh<sub>3</sub> (0.15 g, 0.25 wt%) were heated at of 120 °C under H<sub>2</sub> pressure of 3.0 MPa for 8 h.

Table S6. Degree of hydrogenation for Rh(III)/MSiO<sub>2</sub> **1** with different particle sizes of SiO<sub>2</sub>

| Particle sizes of SiO <sub>2</sub> (μm) | 0.04  | 1     | 10    | 48     | 150    |
|-----------------------------------------|-------|-------|-------|--------|--------|
| HD (%)                                  | 72.92 | 77.86 | 76.66 | 65.23  | 62.40  |
| Separation                              | No    | No    | Hard  | Formal | Formal |

Reaction conditions: NBR solution (200 mL, 3 wt %), supported catalyst (0.12 g, 2 wt %), and PPh<sub>3</sub> (0.06 g, 1 wt %) were heated at 120 °C under H<sub>2</sub> pressure of 3.0 MPa for 6 h.

Table S7. Comparison of degrees of hydrogenation and compositions of fresh and used catalysts

| Recycle           | 1     | 2     | 3     |
|-------------------|-------|-------|-------|
| HD (%)            | 98.53 | 90.35 | 67.61 |
| Content of Rh (%) | 1.18  | 1.03  | 0.98  |
